# Supplementary material for: Production of jet fuel-range hydrocarbon biofuel by hydroxyalkylation–alkylation of furfural with 2-methylfuran and hydrodeoxygenation of C15 fuel precursor over a Ni/γ-Al2O3 catalyst: a reaction mechanism
Source: Royal Society of Chemistry journal article supplement (doi:10.1039/d1ya00078k), 2022-01-01
Supplement: d1ya00078k1.pdf [file d1ya00078k1.pdf]

## Electronic Supplementary Information (ESI)

### Production of jet fuel-range hydrocarbon biofuel by hydroxyalkylation-alkylation of furfural with 2-methylfuran and hydrodeoxygenation of C<sub>15</sub> fuel precursor over Ni/ $\gamma$ -Al<sub>2</sub>O<sub>3</sub> catalyst: A reaction mechanism

Alekhya Kunamalla, Bhushan S. Shirame, and Sunil K. Maity\*

Department of Chemical Engineering, Indian Institute of Technology Hyderabad, Kandi, Sangareddy-502284, Telangana, India.

\*Corresponding author (Prof. Sunil K. Maity): Phone: +91-40-2301-6202; Fax: +91-40-2301 6003; E-mail: sunil\_maity@che.iith.ac.in

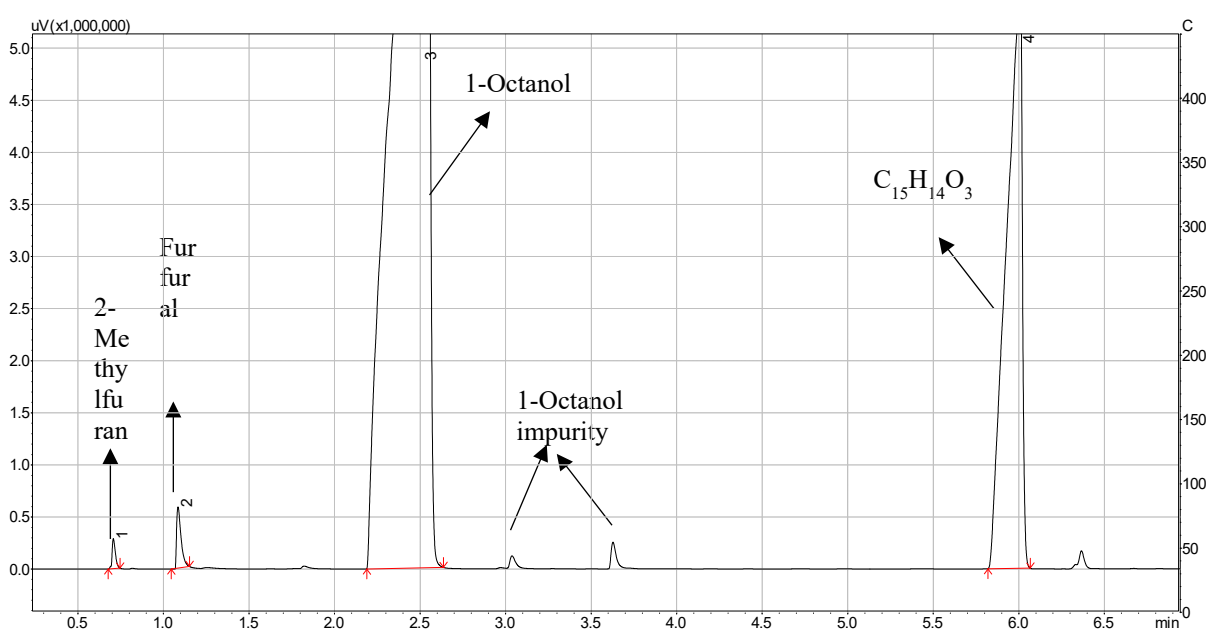

**Fig. S1.** A typical GC-FID chromatogram for HAA of 2-MF with furfural. **GC analysis procedure:** ZB-5HT capillary column (30m  $\times$  0.32mm  $\times$  0.10 $\mu$ m). The oven temperature was increased from 313 K to 508 K using a ramp rate of 10 K/min and maintained there for four minutes. The injector and detector temperatures were maintained at 613 K and 653 K, respectively. **Reaction conditions:** 323 K, 1 g CER, and 2:1 2-MF/furfural.

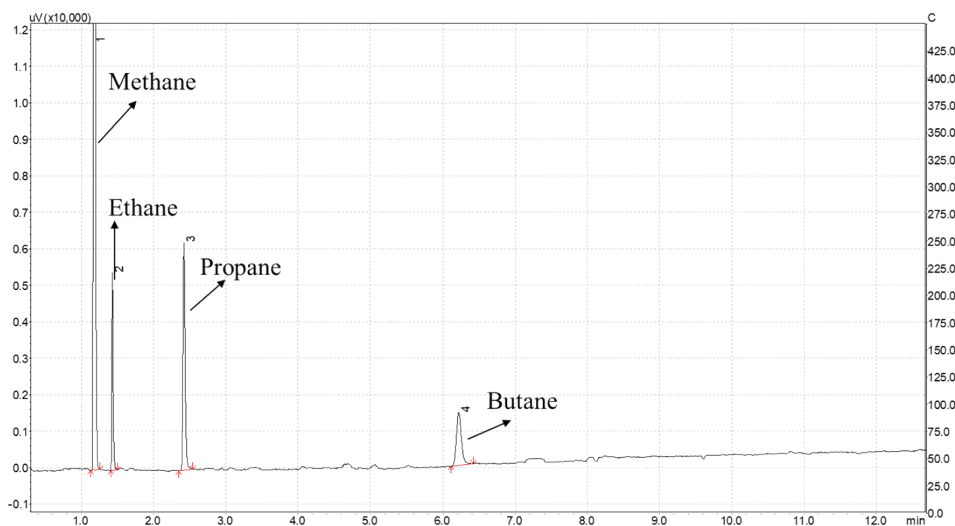

**Fig. S2.** GC-FID chromatogram of gas-phase samples. GC conditions: GS-Gaspro column (30 m  $\times$  0.32 mm  $\times$  0.1  $\mu$ m), 523 K injector and detector temperature, and initial oven temperature of 343 K for 5 min, increased to 503 K with 10 K/min, and hold time there for 4 min. Reaction conditions: 0.5 g 20NiAl, 300 min of reaction time, 543 K, and 30 bar H<sub>2</sub>.

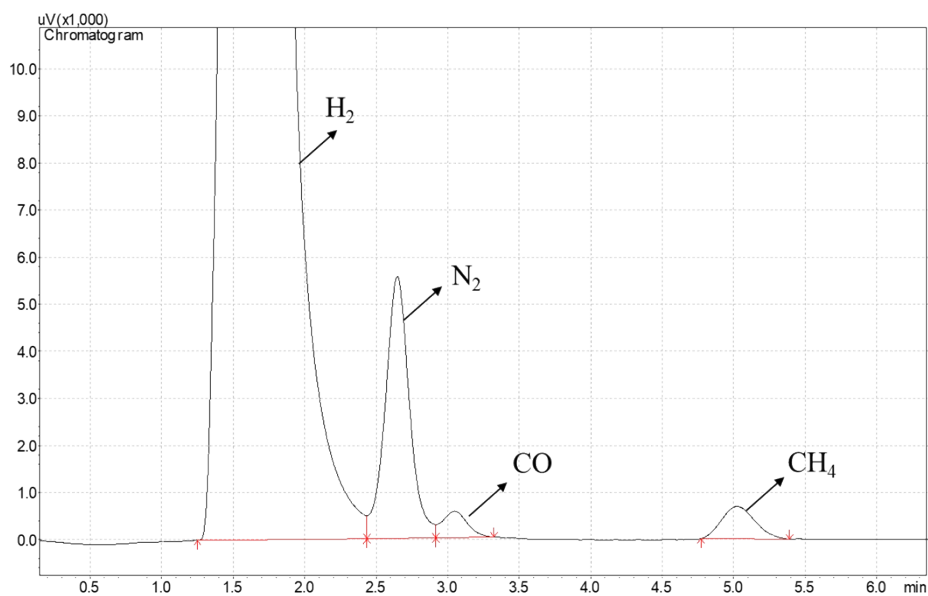

**Fig. S3.** GC-TCD chromatogram of gas-phase samples. GC conditions: Carboseive S-II column, 373 K injector temperature, 523 K detector temperature, and 373 K oven temperature. Reaction conditions: 0.5 g 20NiAl, 543 K, and 30 bar H<sub>2</sub>.

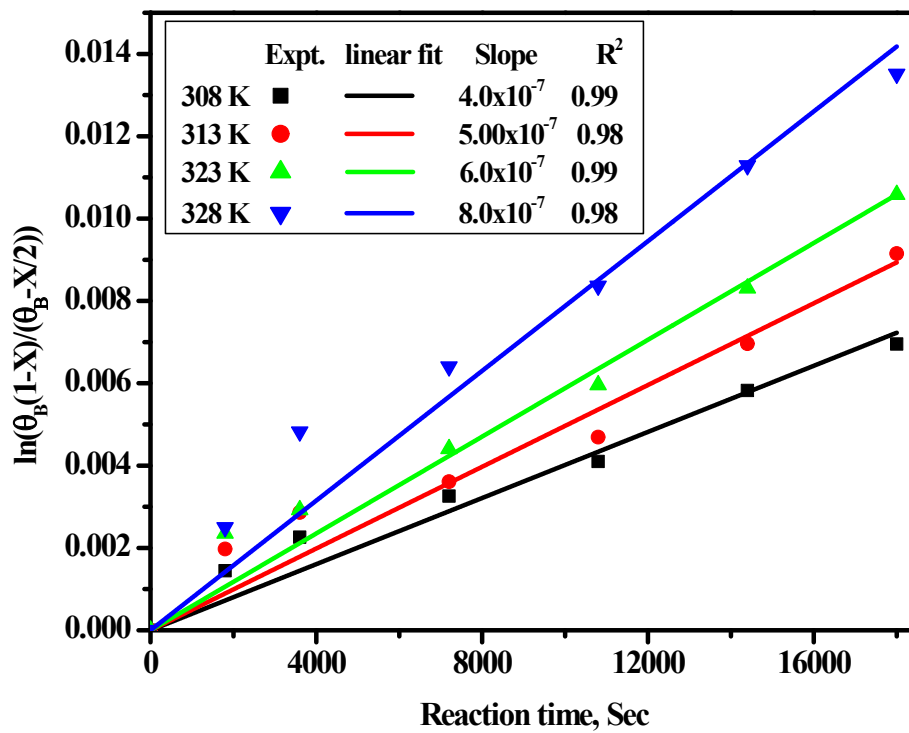

$$\ln \frac{\theta_B(1-X)}{(\theta_B - \frac{X}{2})}$$

Fig. S4. Plot of vs. time (t).

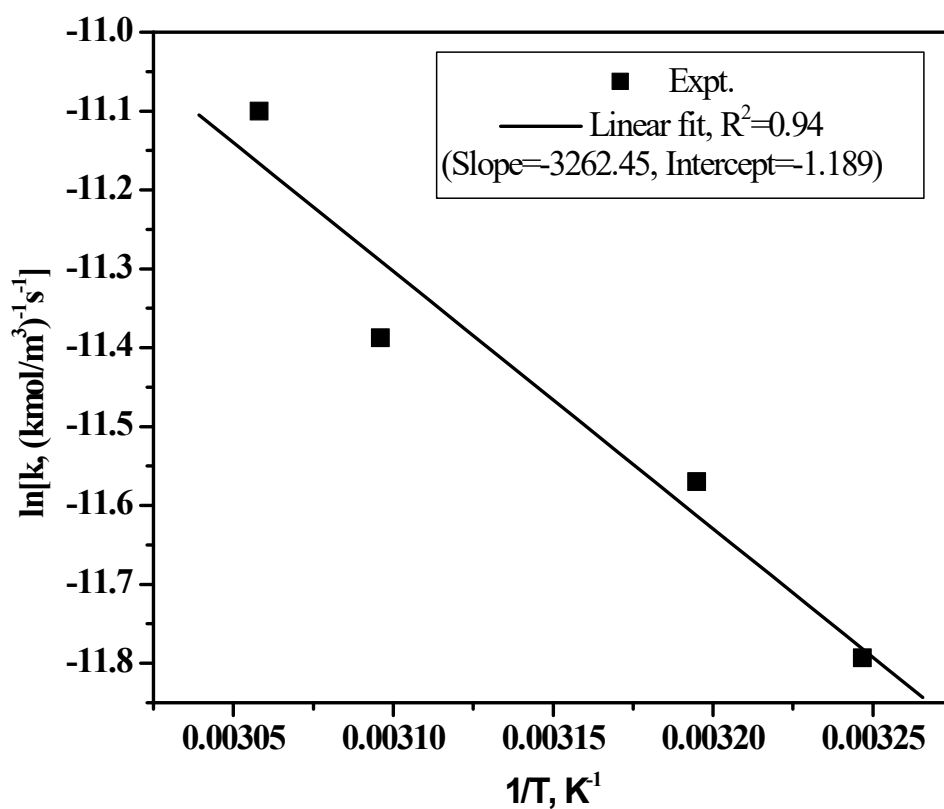

Fig. S5. Arrhenius plot of  $1/T$  vs.  $\ln(k)$ .

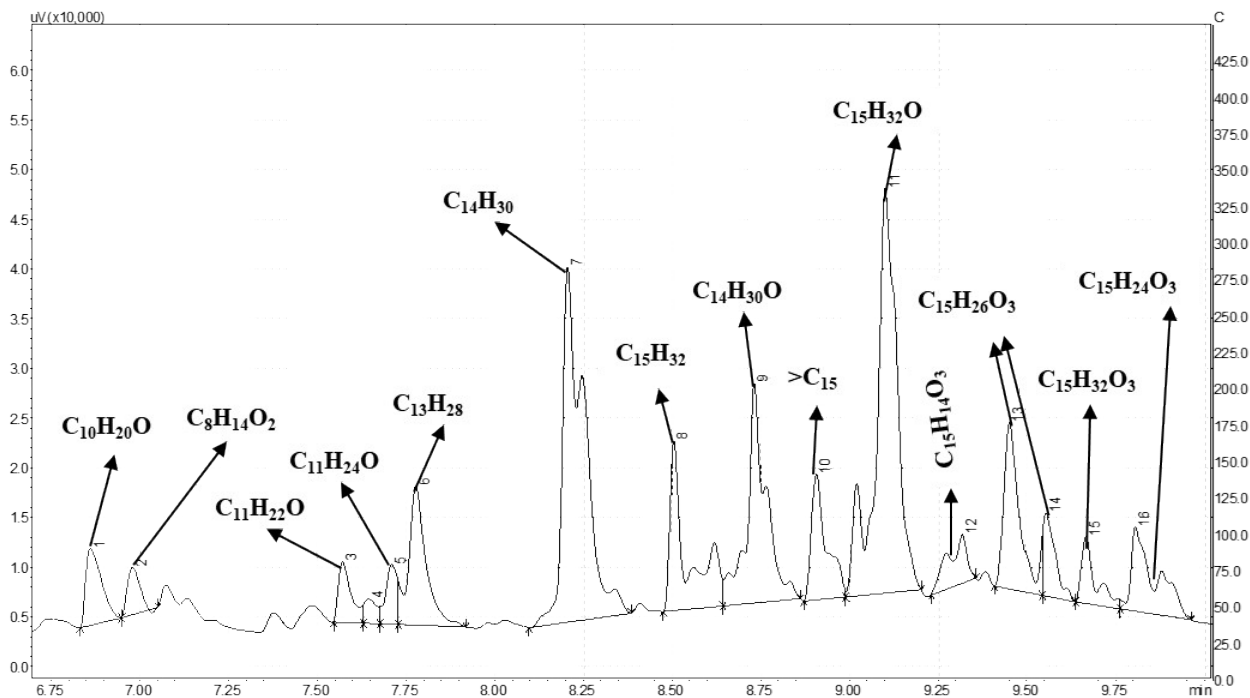

Fig. S6. A typical GC-FID chromatogram for HDO of  $\text{C}_{15}$  fuel precursor. Reaction conditions: 0.5 g 20NiAl, 573 K, 120 min of reaction time, and 30 bar  $\text{H}_2$ .

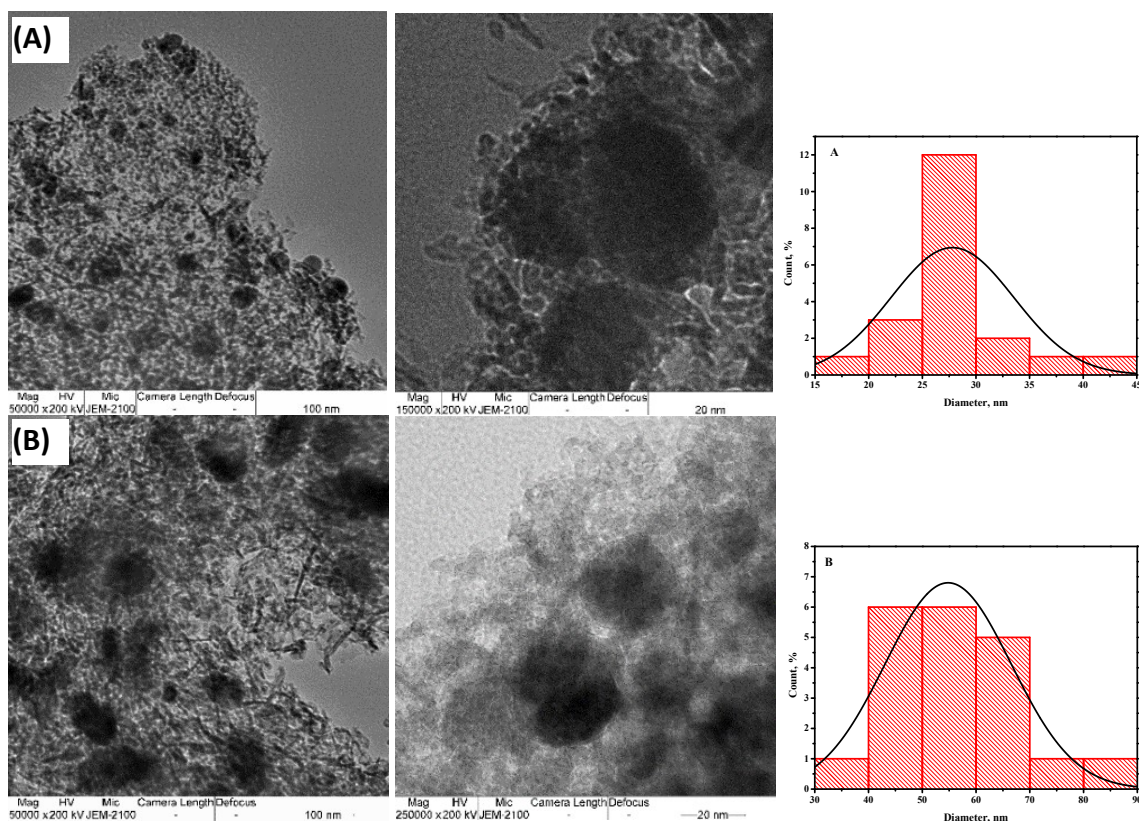

**Fig. S7.** HR-TEM images of (A) freshly prepared and (B) regenerated Ni/γ-Al<sub>2</sub>O<sub>3</sub> catalyst.

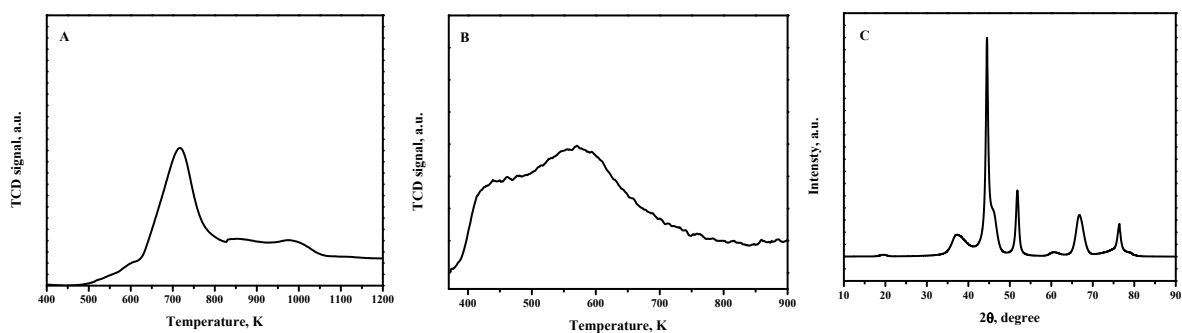

**Fig. S8.** (A) TPR profile of regenerated catalyst (calcined), (B) NH<sub>3</sub>-TPD profile and (C) powder XRD pattern of regenerated catalyst (reduced).
